# Supplementary material
Source: Springer Nature journal article supplement (https://www.springermedizin.de/resource/supplementary/12981_2009_117_MOESM2_ESM.pdf/9603860)

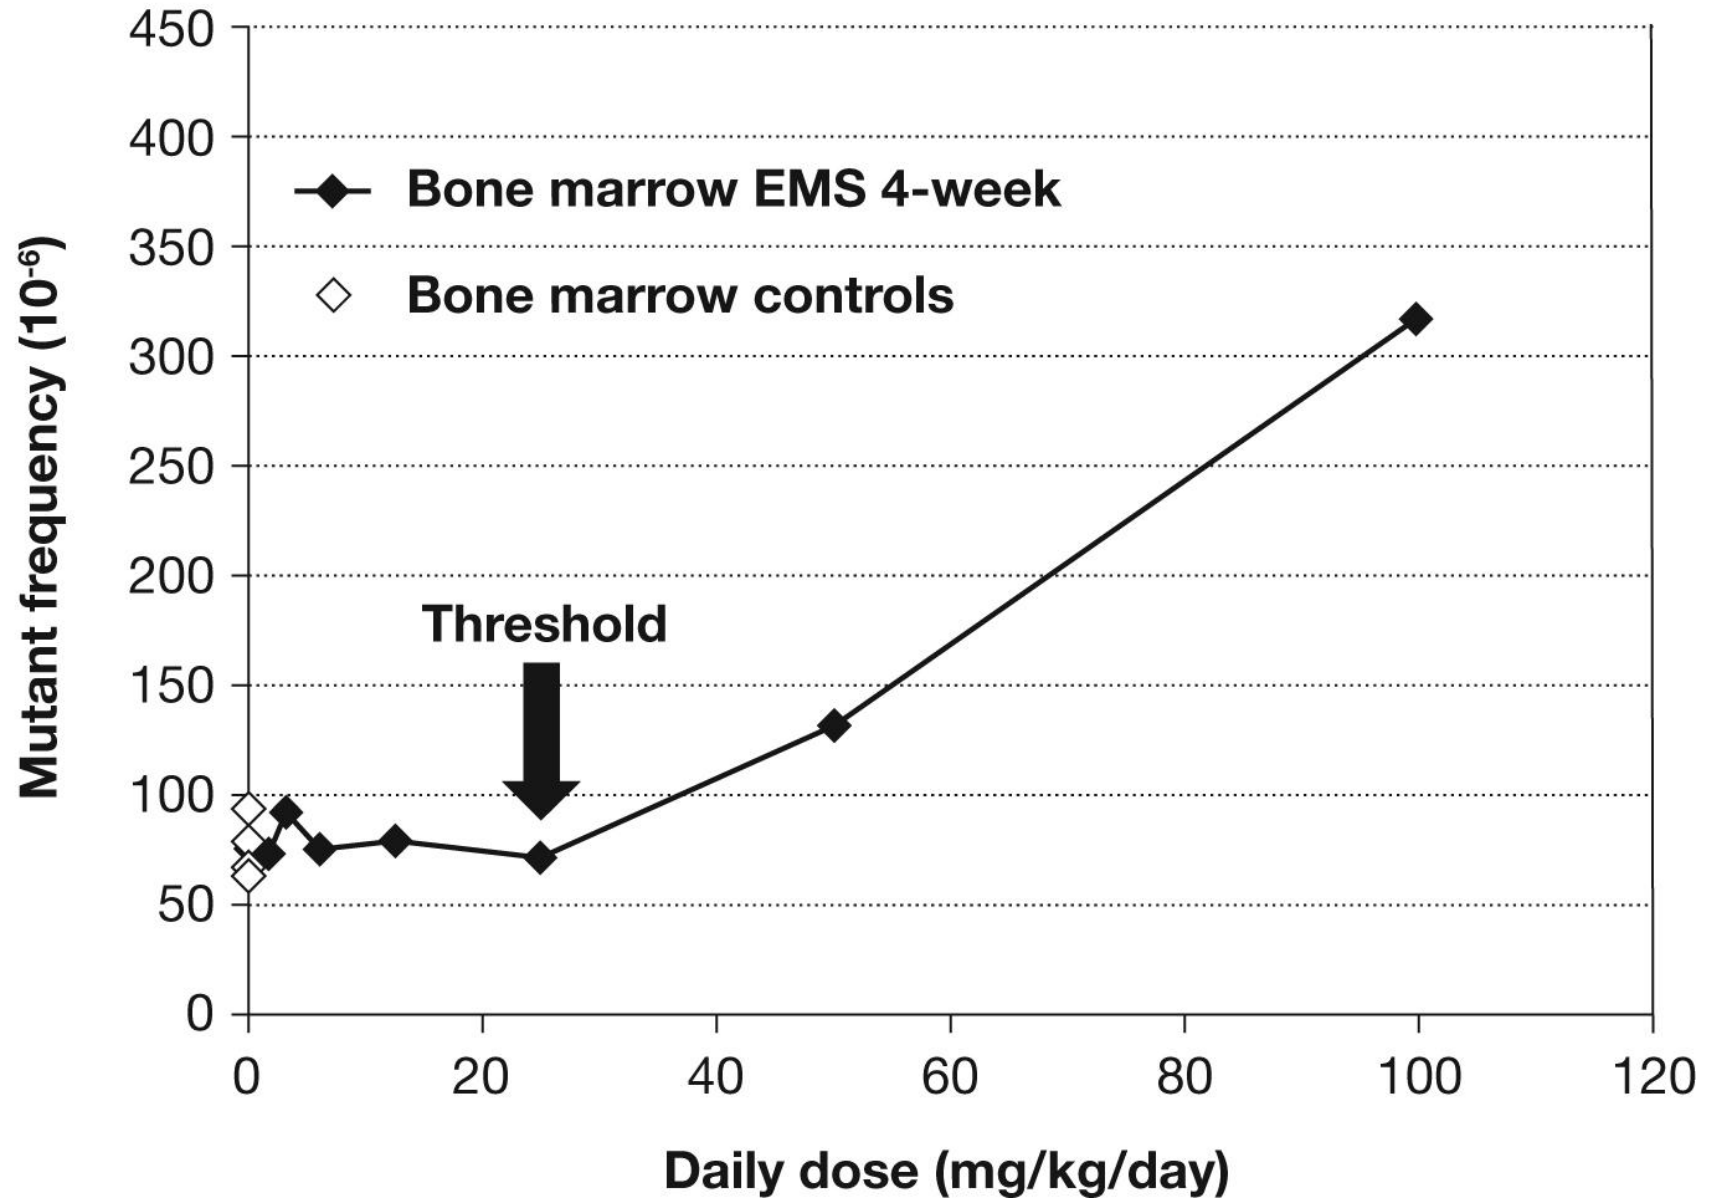

Supplement: MOESM2 [file 9603860]
